# Supplementary material
Source: ML conference proceedings conference paper supplement (https://openaccess.thecvf.com/content/CVPR2026/html/Zeng_Physically_Inspired_Gaussian_CVPR_2026_paper.html)
Supplement: Supplementary file 1 [file Zeng_Physically_Inspired_Gaussian_CVPR_2026_supplemental.pdf]

# Physically Inspired Gaussian Splatting for HDR Novel View Synthesis

## –Supplementary Materials–

This supplementary document is organized as follows:

- Section 1 provides a detailed explanation and pseudo-code to clarify the training procedure of the proposed PhysHDR-GS.
- Section 2 reports per-scene quantitative results on all adopted datasets.
- Section 3 includes more qualitative comparisons on both LDR and HDR views.
- Section 4 introduces further experimental details, including dataset preparation and implementation settings.
- Section 5 includes our observation for HDR-NVS under low-light conditions and discusses potential solutions to address such scenarios.

### 1. Training Procedure

The pseudo-code of the training procedure is summarized in Algorithm 1. PhysHDR-GS is built from three components: physical radiance composition, self-consistent HDR fusion and illumination-guided gradient scaling. Physical radiance modeling incorporates an image–exposure (IE) branch and a Gaussian–illumination (GI) branch. The IE branch composes intrinsic reflectance and ambient illumination into per-Gaussian color and synthesizes the HDR Gaussian primitives, while the GI branch adjusts the illumination and produces relit HDR Gaussian primitives. At the self-consistent HDR fusion stage, the projected HDR image from the IE branch is re-exposed to match the brightness of the relit HDR image of the GI branch. These HDR intermediates are tone-mapped and fused as the final LDR output. During training, the cross-branch HDR consistency loss and illumination-guided gradient scaling are adopted to enable self-supervision for HDR learning and alleviate under-densified representations in over-/under-exposed regions, respectively.

### 2. Per-scene Quantitative Results

We report per-scene quantitative results on HDR-NeRF-Real [2], HDR-Plenoxels-Real [3], and HDR-NeRF-Syn [2] in Table 1, Table 2, Table 3, and Table 4. On HDR-NeRF-Real, Ours<sup>†</sup> achieves leading performance, obtaining the best scores on most scenes, while the 3DGS variant (Ours) also shows competitive results and delivers the

best on several scenes. Notably, compared with the strong GaussHDR variants [5], our method delivers higher rendering speed (e.g., Ours<sup>†</sup> is  $1.37\times$  faster than GaussHDR<sup>†</sup>) and lower memory usage during training. On HDR-Plenoxels-Real, Ours<sup>†</sup> again shows overall superior performance over all compared methods. On the synthetic HDR-NeRF-Syn dataset, Ours<sup>†</sup> consistently outperforms baselines across both exp3 and exp1 exposure settings, achieving the best results on most scenes. This highlights our superiority in reconstructing HDR details, as well as the tone mapping ability to faithfully preserve standard sensor observations.

### 3. More Qualitative Results

We provide additional qualitative LDR results in Figure 1 and HDR results in Figure 2. For each method, we also visualize the residual map with respect to the ground truth to intuitively show the difference (from blue to red, higher values indicate larger errors). For LDR results, existing methods struggle to balance reconstructing dynamic range content and preserving fine structures (e.g., the texture details of HDR-GS [1] at the highlight region are missing). In contrast, our method preserves both dynamic-range detail and local structures, and even reflects environment-conditioned appearance changes (e.g., the reflection of the fireplace), which we attribute to the complementary IE and GI branches that decouple exposure handling and illumination modeling. For HDR results, HDR-NeRF [2] and HDR-GS often fail to reach the correct illumination level due to the lack of HDR ground truth during training, while our approach produces more accurate dynamic-range estimations and sharper reconstructions (e.g., leaf textures in the 4th row), demonstrating the ability to restore dynamic ranges and keep structural details.

### 4. Experimental Settings

**Datasets and settings.** For the HDR-Plenoxels-Real [3] dataset, LDR-NE ( $\{t_2, t_4\}$ ) views are not provided for the *Character* and *Coffee* scenes. Therefore, for LDR-NE results on HDR-Plenoxels-Real, we report the average performance over the remaining *Desk* and *Plant* scenes. For HDR-NeRF-Real [2], HDR-Plenoxels-Real [3], and the synthetic HDR-NeRF-Syn [2], we follow the previous

---

**Algorithm 1** Training Procedure of PhysHDR-GS

---

**Input:** Reflectance  $H_r$ , illumination  $L_a$ , opacity  $\{\alpha_i\}_{i=1}^N$ , centers  $\{\mu_i\}_{i=1}^N$ , covariances  $\{\Sigma_i\}_{i=1}^N$ , input LDR views  $\{I_{gt}^k\}_{k=1}^K$ , lighting level  $\{l^k\}_{k=1}^K$ , exposure  $\{t^k\}_{k=1}^K$

**Output:** Optimized HDR 3D Gaussian primitives  $G_{HDR}^{3D}$

```
1: Initialize  $H_r, L_a$ 
2: while iteration  $\leq$  MaxIteration do
3:    $I_{gt}, l, t \leftarrow$  SampleTrainingView( $\{I_{gt}^k\}_{k=1}^K, \{l^k\}_{k=1}^K, \{t^k\}_{k=1}^K$ );
4:
5:    $c = g(L_a, H_r)$ ; /* Sec. 4.1: Physical Radiance Composition */
6:    $G_{HDR}^{3D} = \{(\mu_i, \Sigma_i, \alpha_i, c_i)\}_{i=1}^N$ ; /* Image-exposure (IE) branch */
7:    $I_{HDR} \leftarrow$  Rasterize( $G_{HDR}^{3D}$ );
8:    $I_{HDR} \times t \leftarrow$  RescaleExposure( $I_{HDR}, t$ );
9:
10:   $\hat{L}_a = \varphi(L_a, l)$ ; /* Gaussian-illumination (GI) branch */
11:   $\hat{c} = g(\hat{L}_a, H_r)$ ; /* Virtual illumination */
12:   $\hat{G}_{HDR}^{3D} = \{(\mu_i, \Sigma_i, \alpha_i, \hat{c}_i)\}_{i=1}^N$ ; /* Relit Gaussians */
13:   $\hat{I}_{HDR} \leftarrow$  Rasterize( $\hat{G}_{HDR}^{3D}$ );
14:
15:   $\{I_{LDR}^{IG}, I_{LDR}^{GI}, I_{LDR}\} \leftarrow$  ToneMapping( $f, I_{HDR} \times t, \hat{I}_{HDR}$ ); /* Sec. 4.2: Self-Consistent HDR Fusion */
16:   $\mathcal{L}_{rec} \leftarrow$  ReconstructionLoss( $\{I_{LDR}, I_{LDR}^{IG}, I_{LDR}^{GI}\}, I_{gt}$ ); /* Tone-mapped LDR learning */
17:   $\mathcal{L}_{cons} \leftarrow$  HDRConsistencyLoss( $I_{HDR}^{IE}, \hat{I}_{HDR}$ ); /* Self-consistent HDR learning */
18:   $\mathcal{L}_{total} \leftarrow$  WeightedLossSum( $\mathcal{L}_{rec}, \mathcal{L}_{cons}, \mathcal{L}_{unit}$ );
19:   $L_a, H_r, \alpha, c, \mu, \Sigma \leftarrow$  AdamOptimize( $\nabla \mathcal{L}_{total}$ )
20:
21:   $s_a \leftarrow$  GradientScaling( $s, L_a, \hat{L}_a$ ); /* Sec. 4.3: Illumination-Guided Gradient Scaling */
22:  if  $s_a \nabla \mathcal{L}_{total} > \tau_p$  then
23:    Densification;
24:  end if
25: end while
```

---

method [5] to downsample the original resolutions by factors of 1/4, 1/6, and 1/2, yielding training resolutions of  $804 \times 534$ ,  $992 \times 746$ , and  $400 \times 400$ , respectively.

**Implementation details.** During training, we adopt the Adam optimizer [4] to optimize the Gaussian parameters, the radiance composer  $g$ , the illumination modulator  $\varphi$ , and the tone mapper  $f$ . The initial learning rates for  $g$  and  $\varphi$  are set to  $6 \times 10^{-5}$ , and the learning rate for the tone mapper is set to  $2 \times 10^{-4}$ . All learning rates are scheduled with a cosine annealing scheme [6]. The densification threshold  $\tau_p$  is set to  $2 \times 10^{-4}$ .

## 5. Discussions

During training, we observe that LDR views captured in low-light conditions may contain significant sensor noise. Fitting view-specific noise can introduce floaters/thin Gaussians. This can be mitigated by applying a noise-prior guided regularization on per-view reconstruction to discourage fitting high-frequency noise. Meanwhile, stronger geometry backbones (e.g., the adopted Scaffold-GS [7]) can

further suppress floaters by constraining Gaussians around anchor points.

## References

- [1] Yuanhao Cai, Zihao Xiao, Yixun Liang, Minghan Qin, Yulun Zhang, Xiaokang Yang, Yaoyao Liu, and Alan L. Yuille. Hdr-gs: Efficient high dynamic range novel view synthesis at 1000x speed via gaussian splatting. *Advances in Neural Information Processing Systems*, 37:68453–68471, 2024. 1, 3, 4, 5, 6
- [2] Xin Huang, Qi Zhang, Ying Feng, Hongdong Li, Xuan Wang, and Qing Wang. Hdr-nerf: High dynamic range neural radiance fields. In *Proceedings of the IEEE/CVF Conference on Computer Vision and Pattern Recognition*, pages 18398–18408, 2022. 1, 3, 4, 5, 6
- [3] Kim Jun-Seong, Kim Yu-Ji, Moon Ye-Bin, and Tae-Hyun Oh. Hdr-plenoxels: Self-calibrating high dynamic range radiance fields. In *European Conference on Computer Vision*, pages 384–401. Springer, 2022. 1, 4
- [4] Diederik P Kingma. Adam: A method for stochastic optimization. *arXiv preprint arXiv:1412.6980*, 2014. 2

Table 1. Per-scene quantitative comparisons of each scene on HDR-NeRF-Real [2] dataset. For each scene, the best and second-best results are highlighted in red and yellow. LDR-OE and LDR-NE denote the LDR results with exposure  $\{t_1, t_3, t_5\}$  and  $\{t_2, t_4\}$ , respectively.

| Method |        | <i>Box</i>             |                 |                    | <i>Computer</i> |                 |                    | <i>Flower</i>   |                 |                    | <i>Luckycat</i> |                 |                    |       |
|--------|--------|------------------------|-----------------|--------------------|-----------------|-----------------|--------------------|-----------------|-----------------|--------------------|-----------------|-----------------|--------------------|-------|
|        |        | PSNR $\uparrow$        | SSIM $\uparrow$ | LPIPS $\downarrow$ | PSNR $\uparrow$ | SSIM $\uparrow$ | LPIPS $\downarrow$ | PSNR $\uparrow$ | SSIM $\uparrow$ | LPIPS $\downarrow$ | PSNR $\uparrow$ | SSIM $\uparrow$ | LPIPS $\downarrow$ |       |
| exp3   | LDR-OE | HDR-NeRF [2]           | 35.13           | 0.9612             | 0.055           | 34.28           | 0.9486             | 0.076           | 33.21           | 0.9525             | 0.058           | 34.47           | 0.9504             | 0.063 |
|        |        | HDR-GS [1]             | 36.21           | 0.9797             | 0.011           | 36.02           | 0.9720             | 0.017           | 32.44           | 0.9603             | 0.039           | 34.82           | 0.9668             | 0.018 |
|        |        | GaussHDR [5]           | 37.17           | 0.9821             | 0.009           | 36.24           | 0.9735             | 0.015           | 34.61           | 0.9681             | 0.020           | 36.19           | 0.9718             | 0.014 |
|        |        | GaussHDR $\dagger$ [5] | 37.18           | 0.9834             | 0.008           | 36.37           | 0.9737             | 0.013           | 35.06           | 0.9757             | 0.012           | 36.67           | 0.9750             | 0.012 |
|        |        | Ours                   | 37.94           | 0.9845             | 0.007           | 35.67           | 0.9761             | 0.012           | 33.91           | 0.9732             | 0.015           | 37.23           | 0.9779             | 0.010 |
|        |        | Ours $\dagger$         | 37.88           | 0.9836             | 0.007           | 37.12           | 0.9746             | 0.011           | 35.32           | 0.9764             | 0.011           | 37.32           | 0.9760             | 0.009 |
|        | LDR-NE | HDR-NeRF [2]           | 31.20           | 0.9518             | 0.081           | 33.56           | 0.9487             | 0.080           | 30.05           | 0.9439             | 0.072           | 33.81           | 0.9458             | 0.063 |
|        |        | HDR-GS [1]             | 29.04           | 0.9697             | 0.024           | 33.23           | 0.9696             | 0.021           | 29.08           | 0.9539             | 0.049           | 32.75           | 0.9612             | 0.021 |
|        |        | GaussHDR               | 33.18           | 0.9774             | 0.013           | 35.12           | 0.9716             | 0.018           | 30.94           | 0.9648             | 0.024           | 34.72           | 0.9690             | 0.015 |
|        |        | GaussHDR $\dagger$ [5] | 33.19           | 0.9784             | 0.011           | 35.37           | 0.9715             | 0.015           | 31.71           | 0.9730             | 0.014           | 35.10           | 0.9722             | 0.013 |
|        |        | Ours                   | 33.75           | 0.9794             | 0.011           | 34.53           | 0.9738             | 0.014           | 30.51           | 0.9671             | 0.020           | 35.92           | 0.9747             | 0.011 |
|        |        | Ours $\dagger$         | 33.42           | 0.9779             | 0.011           | 35.87           | 0.9721             | 0.013           | 31.68           | 0.9730             | 0.014           | 35.62           | 0.9719             | 0.011 |
| exp1   | LDR-OE | HDR-NeRF [2]           | 35.13           | 0.9612             | 0.055           | 34.26           | 0.9486             | 0.076           | 33.18           | 0.9525             | 0.058           | 34.46           | 0.9504             | 0.063 |
|        |        | HDR-GS [1]             | 33.63           | 0.9692             | 0.019           | 34.50           | 0.9672             | 0.020           | 30.14           | 0.9425             | 0.051           | 33.56           | 0.9597             | 0.022 |
|        |        | GaussHDR [5]           | 36.21           | 0.9780             | 0.012           | 34.85           | 0.9679             | 0.019           | 32.78           | 0.9617             | 0.024           | 34.52           | 0.9637             | 0.018 |
|        |        | GaussHDR $\dagger$ [5] | 35.44           | 0.9780             | 0.010           | 34.38           | 0.9679             | 0.016           | 33.23           | 0.9695             | 0.015           | 35.46           | 0.9687             | 0.015 |
|        |        | Ours                   | 36.55           | 0.9800             | 0.009           | 34.48           | 0.9692             | 0.016           | 32.43           | 0.9638             | 0.022           | 35.10           | 0.9699             | 0.014 |
|        |        | Ours $\dagger$         | 35.69           | 0.9766             | 0.010           | 35.07           | 0.9693             | 0.013           | 33.42           | 0.9685             | 0.014           | 35.17           | 0.9677             | 0.013 |
|        | LDR-NE | HDR-NeRF [2]           | 31.17           | 0.9518             | 0.081           | 31.17           | 0.9518             | 0.081           | 30.05           | 0.9439             | 0.072           | 33.80           | 0.9457             | 0.063 |
|        |        | HDR-GS [1]             | 27.35           | 0.9578             | 0.033           | 31.20           | 0.9643             | 0.025           | 28.61           | 0.9403             | 0.055           | 31.47           | 0.9516             | 0.027 |
|        |        | GaussHDR [5]           | 33.18           | 0.9742             | 0.014           | 34.31           | 0.9671             | 0.021           | 30.86           | 0.9605             | 0.026           | 33.56           | 0.9593             | 0.019 |
|        |        | GaussHDR $\dagger$ [5] | 32.90           | 0.9741             | 0.013           | 34.04           | 0.9670             | 0.018           | 31.90           | 0.9677             | 0.016           | 34.32           | 0.9646             | 0.017 |
|        |        | Ours                   | 32.33           | 0.9746             | 0.013           | 33.60           | 0.9677             | 0.018           | 30.55           | 0.9605             | 0.026           | 34.06           | 0.9660             | 0.015 |
|        |        | Ours $\dagger$         | 33.02           | 0.9730             | 0.013           | 34.55           | 0.9683             | 0.015           | 32.13           | 0.9665             | 0.015           | 33.92           | 0.9630             | 0.015 |

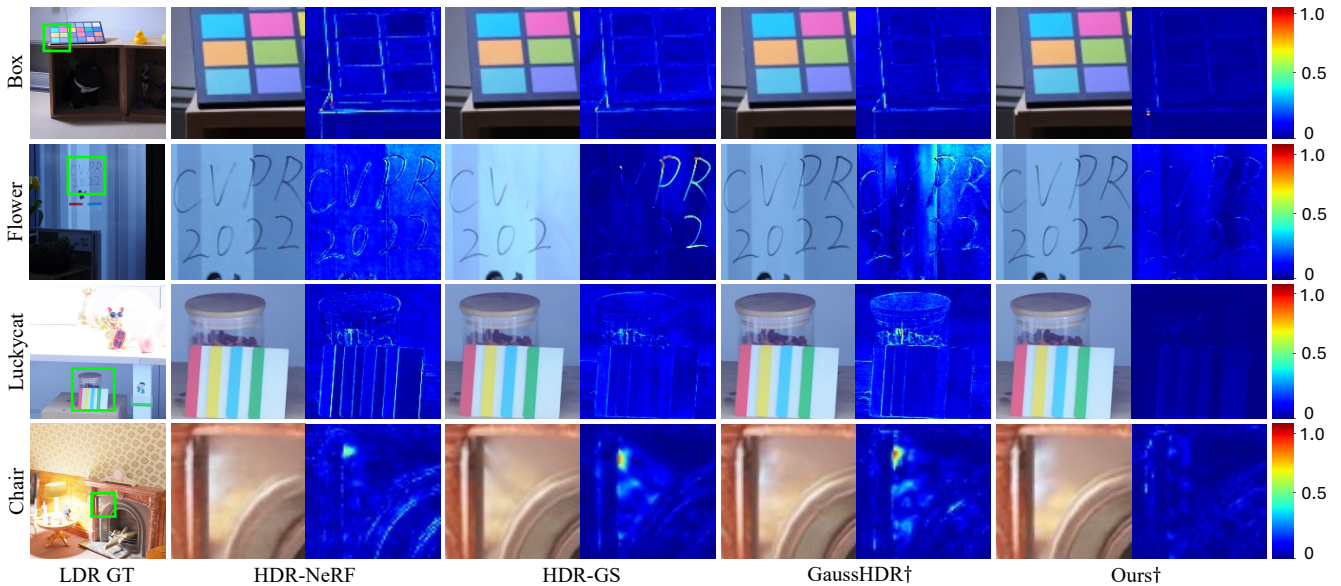

Figure 1. Qualitative results on LDR views, where residual maps between the rendered results and ground truth are visualized to highlight the difference. HDR-GS struggles to balance between dynamic-range content reconstruction and fine-structure preservation (e.g., characters in the highlight region of the 2nd row are missing), whereas our approach delivers accurate dynamic-range estimations and sharper details.

Table 2. Per-scene quantitative comparisons on the HDR-Plenoxels-Real [3] dataset. HDR-NeRF [2] is not included, as it is evaluated on HDR-Plenoxels-Real. For each scene, the best and second-best results are highlighted in red and yellow. LDR-OE and LDR-NE denote LDR results with exposure sets  $\{t_1, t_3, t_5\}$  and  $\{t_2, t_4\}$ , respectively.

| Method |        | Character              |                 |                    | Coffee          |                 |                    | Desk            |                 |                    | Plant           |                 |                    |       |
|--------|--------|------------------------|-----------------|--------------------|-----------------|-----------------|--------------------|-----------------|-----------------|--------------------|-----------------|-----------------|--------------------|-------|
|        |        | PSNR $\uparrow$        | SSIM $\uparrow$ | LPIPS $\downarrow$ | PSNR $\uparrow$ | SSIM $\uparrow$ | LPIPS $\downarrow$ | PSNR $\uparrow$ | SSIM $\uparrow$ | LPIPS $\downarrow$ | PSNR $\uparrow$ | SSIM $\uparrow$ | LPIPS $\downarrow$ |       |
| exp3   | LDR-OE | HDR-GS [1]             | 36.08           | 0.9799             | 0.024           | 28.13           | 0.9468             | 0.046           | 30.07           | 0.9366             | 0.039           | 30.39           | 0.9403             | 0.049 |
|        |        | GaussHDR [5]           | 36.47           | 0.9813             | 0.024           | 29.10           | 0.9512             | 0.041           | 29.79           | 0.9355             | 0.038           | 30.63           | 0.9439             | 0.043 |
|        |        | GaussHDR $\dagger$ [5] | 39.09           | 0.9847             | 0.017           | 29.82           | 0.9597             | 0.029           | 30.52           | 0.9417             | 0.031           | 32.05           | 0.9499             | 0.036 |
|        |        | Ours                   | 39.45           | 0.9854             | 0.015           | 28.94           | 0.9538             | 0.035           | 29.79           | 0.9351             | 0.037           | 30.56           | 0.9402             | 0.046 |
|        |        | Ours $\dagger$         | 40.34           | 0.9870             | 0.013           | 29.51           | 0.9585             | 0.026           | 30.66           | 0.9428             | 0.028           | 31.72           | 0.9486             | 0.034 |
|        | LDR-NE | HDR-GS [1]             | -               | -                  | -               | -               | -                  | -               | 28.12           | 0.9260             | 0.044           | 29.09           | 0.9309             | 0.057 |
|        |        | GaussHDR [5]           | -               | -                  | -               | -               | -                  | -               | 28.26           | 0.9272             | 0.042           | 29.59           | 0.9380             | 0.047 |
|        |        | GaussHDR $\dagger$ [5] | -               | -                  | -               | -               | -                  | -               | 28.61           | 0.9330             | 0.034           | 30.95           | 0.9451             | 0.040 |
|        |        | Ours                   | -               | -                  | -               | -               | -                  | -               | 28.12           | 0.9259             | 0.041           | 29.47           | 0.9339             | 0.051 |
|        |        | Ours $\dagger$         | -               | -                  | -               | -               | -                  | -               | 28.91           | 0.9339             | 0.030           | 30.61           | 0.9439             | 0.037 |
| exp1   | LDR-OE | HDR-GS [1]             | 34.85           | 0.9773             | 0.029           | 25.21           | 0.9194             | 0.070           | 29.24           | 0.9250             | 0.044           | 29.16           | 0.9275             | 0.059 |
|        |        | GaussHDR [5]           | 36.36           | 0.9801             | 0.024           | 28.02           | 0.9432             | 0.048           | 29.08           | 0.9242             | 0.044           | 30.03           | 0.9355             | 0.048 |
|        |        | GaussHDR $\dagger$ [5] | 38.24           | 0.9830             | 0.018           | 29.31           | 0.9549             | 0.032           | 29.91           | 0.9331             | 0.035           | 31.48           | 0.9448             | 0.040 |
|        |        | Ours                   | 38.13           | 0.9836             | 0.017           | 28.69           | 0.9479             | 0.040           | 28.78           | 0.9240             | 0.040           | 29.19           | 0.9301             | 0.050 |
|        |        | Ours $\dagger$         | 38.68           | 0.9839             | 0.015           | 29.54           | 0.9551             | 0.029           | 29.87           | 0.9326             | 0.035           | 31.26           | 0.9444             | 0.037 |
|        | LDR-NE | HDR-GS [1]             | -               | -                  | -               | -               | -                  | -               | 27.12           | 0.9134             | 0.052           | 27.52           | 0.9167             | 0.069 |
|        |        | GaussHDR [5]           | -               | -                  | -               | -               | -                  | -               | 27.56           | 0.9163             | 0.046           | 28.96           | 0.9297             | 0.053 |
|        |        | GaussHDR $\dagger$ [5] | -               | -                  | -               | -               | -                  | -               | 27.21           | 0.9225             | 0.038           | 30.55           | 0.9405             | 0.044 |
|        |        | Ours                   | -               | -                  | -               | -               | -                  | -               | 27.37           | 0.9152             | 0.042           | 27.82           | 0.9234             | 0.053 |
|        |        | Ours $\dagger$         | -               | -                  | -               | -               | -                  | -               | 27.96           | 0.9227             | 0.037           | 30.17           | 0.9399             | 0.040 |

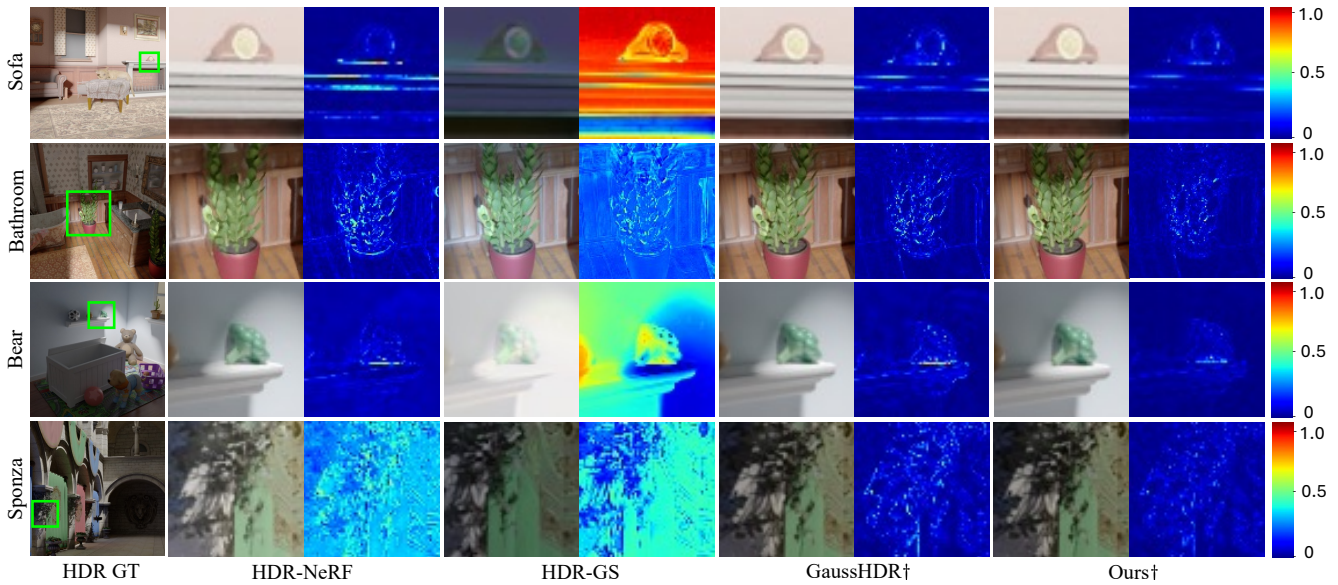

Figure 2. Qualitative results on HDR views, where residual maps between the rendered results and ground truth are visualized to highlight the differences. HDR-NeRF and HDR-GS fail to reach the target illumination level due to the absence of HDR ground truth during training, whereas our results yield accurate dynamic-range estimations and sharper reconstructions (e.g., leaf textures in the 4th row).

[5] Jinfeng Liu, Lingtong Kong, Bo Li, and Dan Xu. Gausshdr: High dynamic range gaussian splatting via learning unified 3d and 2d local tone mapping. In *Proceedings of the Computer Vision and Pattern Recognition Conference*, pages 5991–

6000, 2025. 1, 2, 3, 4, 5, 6  
 [6] Ilya Loshchilov and Frank Hutter. Sgdr: Stochastic gradient descent with warm restarts. *arXiv preprint arXiv:1608.03983*, 2016. 2

Table 3. Per-scene quantitative comparisons on the HDR-NeRF-Syn [2] dataset under the exp3 exposure setting. For each scene, the best and second-best results are highlighted in red and yellow. LDR-OE and LDR-NE denote LDR results with exposure sets  $\{t_1, t_3, t_5\}$  and  $\{t_2, t_4\}$ , respectively.

| Method |                        | <i>Bathroom</i>   |                 |                    | <i>Bear</i>     |                 |                    | <i>Chair</i>    |                 |                    | <i>Desk</i>     |                 |                    |
|--------|------------------------|-------------------|-----------------|--------------------|-----------------|-----------------|--------------------|-----------------|-----------------|--------------------|-----------------|-----------------|--------------------|
|        |                        | PSNR $\uparrow$   | SSIM $\uparrow$ | LPIPS $\downarrow$ | PSNR $\uparrow$ | SSIM $\uparrow$ | LPIPS $\downarrow$ | PSNR $\uparrow$ | SSIM $\uparrow$ | LPIPS $\downarrow$ | PSNR $\uparrow$ | SSIM $\uparrow$ | LPIPS $\downarrow$ |
| LDR-OE | HDR-NeRF [2]           | 33.98             | 0.9067          | 0.108              | 43.96           | 0.9917          | 0.007              | 34.36           | 0.9286          | 0.064              | 38.78           | 0.9735          | 0.021              |
|        | HDR-GS [1]             | 42.29             | 0.9796          | 0.008              | 38.61           | 0.9835          | 0.015              | 37.75           | 0.9734          | 0.013              | 43.62           | 0.9885          | 0.004              |
|        | GaussHDR [5]           | 42.38             | 0.9803          | 0.006              | 45.60           | 0.9934          | 0.002              | 37.44           | 0.9671          | 0.015              | 42.84           | 0.9888          | 0.004              |
|        | GaussHDR $\dagger$ [5] | 42.97             | 0.9844          | 0.006              | 46.71           | 0.9945          | 0.001              | 38.48           | 0.9746          | 0.011              | 43.77           | 0.9905          | 0.003              |
|        | Ours                   | 42.34             | 0.9790          | 0.006              | 46.76           | 0.9942          | 0.002              | 37.89           | 0.9708          | 0.012              | 43.78           | 0.9881          | 0.003              |
|        | Ours $\dagger$         | 43.25             | 0.9839          | 0.005              | 47.14           | 0.9945          | 0.001              | 38.85           | 0.9745          | 0.010              | 44.50           | 0.9910          | 0.002              |
| LDR-NE | HDR-NeRF [2]           | 33.30             | 0.9041          | 0.115              | 42.46           | 0.9906          | 0.009              | 33.55           | 0.9214          | 0.072              | 39.47           | 0.9748          | 0.019              |
|        | HDR-GS [1]             | 37.81             | 0.9745          | 0.024              | 12.70           | 0.7217          | 0.196              | 32.73           | 0.9561          | 0.040              | 37.24           | 0.9815          | 0.014              |
|        | GaussHDR [5]           | 42.04             | 0.9813          | 0.006              | 44.92           | 0.9928          | 0.002              | 36.81           | 0.9651          | 0.016              | 42.45           | 0.9887          | 0.004              |
|        | GaussHDR $\dagger$ [5] | 42.49             | 0.9849          | 0.006              | 45.51           | 0.9937          | 0.002              | 37.73           | 0.9729          | 0.013              | 43.12           | 0.9902          | 0.003              |
|        | Ours                   | 41.96             | 0.9801          | 0.006              | 45.80           | 0.9935          | 0.002              | 37.21           | 0.9693          | 0.013              | 43.31           | 0.9883          | 0.003              |
|        | Ours $\dagger$         | 42.39             | 0.9844          | 0.005              | 45.40           | 0.9937          | 0.002              | 38.14           | 0.9733          | 0.011              | 43.12           | 0.9906          | 0.002              |
| HDR    | HDR-NeRF [2]           | 23.06             | 0.9556          | 0.092              | 26.35           | 0.9631          | 0.024              | 26.38           | 0.9555          | 0.057              | 44.11           | 0.9936          | 0.007              |
|        | HDR-GS [1]             | 20.77             | 0.8493          | 0.095              | 9.10            | 0.6961          | 0.241              | 14.30           | 0.2937          | 0.404              | 29.40           | 0.8144          | 0.102              |
|        | GaussHDR [5]           | 35.35             | 0.9491          | 0.021              | 42.09           | 0.9879          | 0.006              | 37.15           | 0.9604          | 0.020              | 44.50           | 0.9932          | 0.006              |
|        | GaussHDR $\dagger$ [5] | 36.45             | 0.9565          | 0.016              | 42.83           | 0.9891          | 0.004              | 38.42           | 0.9685          | 0.016              | 44.86           | 0.9933          | 0.005              |
|        | Ours                   | 36.05             | 0.9495          | 0.016              | 42.61           | 0.9887          | 0.004              | 38.00           | 0.9655          | 0.016              | 44.83           | 0.9935          | 0.004              |
|        | Ours $\dagger$         | 36.63             | 0.9558          | 0.015              | 42.86           | 0.9891          | 0.004              | 38.55           | 0.9686          | 0.014              | 45.08           | 0.9938          | 0.004              |
|        |                        | <i>Diningroom</i> |                 |                    | <i>Dog</i>      |                 |                    | <i>Sofa</i>     |                 |                    | <i>Sponza</i>   |                 |                    |
|        |                        | PSNR $\uparrow$   | SSIM $\uparrow$ | LPIPS $\downarrow$ | PSNR $\uparrow$ | SSIM $\uparrow$ | LPIPS $\downarrow$ | PSNR $\uparrow$ | SSIM $\uparrow$ | LPIPS $\downarrow$ | PSNR $\uparrow$ | SSIM $\uparrow$ | LPIPS $\downarrow$ |
| LDR-OE | HDR-NeRF [2]           | 43.33             | 0.9894          | 0.008              | 39.50           | 0.9840          | 0.013              | 39.83           | 0.9818          | 0.013              | 36.80           | 0.9701          | 0.020              |
|        | HDR-GS [1]             | 32.96             | 0.9254          | 0.090              | 41.65           | 0.9920          | 0.005              | 43.45           | 0.9921          | 0.003              | 41.96           | 0.9901          | 0.004              |
|        | GaussHDR [5]           | 40.44             | 0.9813          | 0.015              | 43.58           | 0.9927          | 0.003              | 43.82           | 0.9917          | 0.003              | 42.09           | 0.9868          | 0.008              |
|        | GaussHDR $\dagger$ [5] | 45.65             | 0.9948          | 0.002              | 44.59           | 0.9948          | 0.002              | 44.96           | 0.9934          | 0.002              | 43.80           | 0.9922          | 0.003              |
|        | Ours                   | 44.62             | 0.9930          | 0.003              | 44.34           | 0.9939          | 0.002              | 44.66           | 0.9931          | 0.002              | 40.50           | 0.9660          | 0.034              |
|        | Ours $\dagger$         | 45.94             | 0.9949          | 0.001              | 45.18           | 0.9953          | 0.002              | 45.38           | 0.9942          | 0.002              | 43.85           | 0.9910          | 0.004              |
| LDR-NE | HDR-NeRF [2]           | 42.38             | 0.9892          | 0.008              | 38.47           | 0.9823          | 0.014              | 38.70           | 0.9806          | 0.013              | 36.23           | 0.9702          | 0.020              |
|        | HDR-GS [1]             | 27.38             | 0.8968          | 0.135              | 15.10           | 0.7027          | 0.336              | 17.30           | 0.7788          | 0.258              | 36.28           | 0.9832          | 0.010              |
|        | GaussHDR [5]           | 39.37             | 0.9795          | 0.017              | 42.71           | 0.9921          | 0.004              | 43.11           | 0.9918          | 0.003              | 41.76           | 0.9884          | 0.006              |
|        | GaussHDR $\dagger$ [5] | 44.26             | 0.9942          | 0.002              | 42.13           | 0.9937          | 0.003              | 43.34           | 0.9930          | 0.003              | 43.34           | 0.9925          | 0.003              |
|        | Ours                   | 43.90             | 0.9927          | 0.003              | 43.31           | 0.9935          | 0.002              | 44.00           | 0.9931          | 0.002              | 40.36           | 0.9713          | 0.036              |
|        | Ours $\dagger$         | 44.72             | 0.9944          | 0.002              | 43.78           | 0.9949          | 0.002              | 44.62           | 0.9942          | 0.002              | 43.37           | 0.9914          | 0.004              |
| HDR    | HDR-NeRF [2]           | 22.84             | 0.9360          | 0.047              | 18.08           | 0.8729          | 0.066              | 22.01           | 0.9541          | 0.058              | 26.63           | 0.9523          | 0.046              |
|        | HDR-GS [1]             | 22.98             | 0.8760          | 0.149              | 20.10           | 0.8444          | 0.202              | 7.94            | 0.4471          | 0.347              | 15.46           | 0.7648          | 0.099              |
|        | GaussHDR [5]           | 35.26             | 0.9664          | 0.027              | 36.50           | 0.9745          | 0.015              | 36.97           | 0.9675          | 0.015              | 34.42           | 0.9642          | 0.025              |
|        | GaussHDR $\dagger$ [5] | 39.26             | 0.9844          | 0.007              | 37.52           | 0.9781          | 0.011              | 37.44           | 0.9704          | 0.012              | 35.82           | 0.9733          | 0.014              |
|        | Ours                   | 38.89             | 0.9826          | 0.008              | 37.73           | 0.9784          | 0.011              | 37.48           | 0.9705          | 0.011              | 34.53           | 0.9389          | 0.056              |
|        | Ours $\dagger$         | 39.27             | 0.9842          | 0.006              | 37.85           | 0.9794          | 0.010              | 37.68           | 0.9718          | 0.011              | 35.74           | 0.9720          | 0.014              |

[7] Tao Lu, Mulin Yu, Linning Xu, Yuanbo Xiangli, Limin Wang, Dahua Lin, and Bo Dai. Scaffold-gs: Structured 3d gaussians for view-adaptive rendering. In *Proceedings of the IEEE/CVF Conference on Computer Vision and Pattern Recognition*, pages 20654–20664, 2024. 2

Table 4. Per-scene quantitative comparisons on the HDR-NeRF-Syn [2] dataset under the exp1 exposure setting. For each scene, the best and second-best results are highlighted in red and yellow. LDR-OE and LDR-NE denote LDR results with exposure sets  $\{t_1, t_3, t_5\}$  and  $\{t_2, t_4\}$ , respectively.

| Method |                        | <i>Bathroom</i>   |                 |                    | <i>Bear</i>     |                 |                    | <i>Chair</i>    |                 |                    | <i>Desk</i>     |                 |                    |
|--------|------------------------|-------------------|-----------------|--------------------|-----------------|-----------------|--------------------|-----------------|-----------------|--------------------|-----------------|-----------------|--------------------|
|        |                        | PSNR $\uparrow$   | SSIM $\uparrow$ | LPIPS $\downarrow$ | PSNR $\uparrow$ | SSIM $\uparrow$ | LPIPS $\downarrow$ | PSNR $\uparrow$ | SSIM $\uparrow$ | LPIPS $\downarrow$ | PSNR $\uparrow$ | SSIM $\uparrow$ | LPIPS $\downarrow$ |
| LDR-OE | HDR-NeRF [2]           | 33.97             | 0.9066          | 0.108              | 43.81           | 0.9915          | 0.007              | 34.31           | 0.9284          | 0.064              | 38.26           | 0.9701          | 0.023              |
|        | HDR-GS [1]             | 40.62             | 0.9734          | 0.011              | 36.31           | 0.9745          | 0.020              | 35.21           | 0.9610          | 0.022              | 41.34           | 0.9847          | 0.006              |
|        | GaussHDR [5]           | 41.02             | 0.9731          | 0.009              | 44.02           | 0.9912          | 0.003              | 37.01           | 0.9678          | 0.014              | 42.46           | 0.9872          | 0.004              |
|        | GaussHDR $\dagger$ [5] | 42.08             | 0.9807          | 0.006              | 45.40           | 0.9934          | 0.002              | 37.65           | 0.9712          | 0.012              | 43.03           | 0.9896          | 0.003              |
|        | Ours                   | 40.75             | 0.9740          | 0.009              | 45.42           | 0.9933          | 0.002              | 37.36           | 0.9695          | 0.013              | 42.31           | 0.9884          | 0.004              |
|        | Ours $\dagger$         | 42.17             | 0.9801          | 0.006              | 45.49           | 0.9933          | 0.002              | 37.64           | 0.9712          | 0.012              | 42.30           | 0.9895          | 0.003              |
| LDR-NE | HDR-NeRF [2]           | 33.29             | 0.9040          | 0.115              | 42.35           | 0.9903          | 0.009              | 33.51           | 0.9212          | 0.072              | 36.47           | 0.9611          | 0.027              |
|        | HDR-GS [1]             | 34.99             | 0.9653          | 0.035              | 12.58           | 0.7105          | 0.215              | 27.47           | 0.9108          | 0.087              | 33.47           | 0.9697          | 0.029              |
|        | GaussHDR [5]           | 40.81             | 0.9749          | 0.009              | 43.48           | 0.9906          | 0.003              | 36.54           | 0.9673          | 0.015              | 42.36           | 0.9874          | 0.004              |
|        | GaussHDR $\dagger$ [5] | 41.70             | 0.9818          | 0.007              | 44.43           | 0.9927          | 0.002              | 37.14           | 0.9698          | 0.013              | 42.76           | 0.9895          | 0.003              |
|        | Ours                   | 40.49             | 0.9754          | 0.009              | 44.36           | 0.9927          | 0.002              | 36.90           | 0.9686          | 0.014              | 42.07           | 0.9888          | 0.004              |
|        | Ours $\dagger$         | 41.85             | 0.9814          | 0.006              | 44.50           | 0.9926          | 0.002              | 37.28           | 0.9703          | 0.012              | 42.10           | 0.9899          | 0.003              |
| HDR    | HDR-NeRF [2]           | 23.09             | 0.9558          | 0.090              | 26.56           | 0.9649          | 0.023              | 26.36           | 0.9554          | 0.057              | 44.01           | 0.9932          | 0.007              |
|        | HDR-GS [1]             | 20.01             | 0.8370          | 0.113              | 14.01           | 0.7845          | 0.191              | 12.64           | 0.0876          | 0.591              | 22.79           | 0.4358          | 0.305              |
|        | GaussHDR [5]           | 34.60             | 0.9401          | 0.025              | 41.22           | 0.9855          | 0.007              | 36.76           | 0.9621          | 0.020              | 44.01           | 0.9931          | 0.006              |
|        | GaussHDR $\dagger$ [5] | 36.21             | 0.9522          | 0.017              | 42.22           | 0.9881          | 0.005              | 37.79           | 0.9659          | 0.017              | 43.83           | 0.9932          | 0.005              |
|        | Ours                   | 35.53             | 0.9436          | 0.019              | 42.12           | 0.9881          | 0.005              | 37.64           | 0.9653          | 0.017              | 44.05           | 0.9932          | 0.005              |
|        | Ours $\dagger$         | 36.31             | 0.9517          | 0.015              | 42.31           | 0.9880          | 0.004              | 37.92           | 0.9663          | 0.015              | 43.96           | 0.9934          | 0.005              |
|        |                        | <i>Diningroom</i> |                 |                    | <i>Dog</i>      |                 |                    | <i>Sofa</i>     |                 |                    | <i>Sponza</i>   |                 |                    |
|        |                        | PSNR $\uparrow$   | SSIM $\uparrow$ | LPIPS $\downarrow$ | PSNR $\uparrow$ | SSIM $\uparrow$ | LPIPS $\downarrow$ | PSNR $\uparrow$ | SSIM $\uparrow$ | LPIPS $\downarrow$ | PSNR $\uparrow$ | SSIM $\uparrow$ | LPIPS $\downarrow$ |
| LDR-OE | HDR-NeRF [2]           | 43.29             | 0.9894          | 0.008              | 39.49           | 0.9840          | 0.013              | 39.71           | 0.9815          | 0.013              | 36.61           | 0.9683          | 0.020              |
|        | HDR-GS [1]             | 30.17             | 0.8914          | 0.130              | 40.20           | 0.9888          | 0.007              | 40.98           | 0.9888          | 0.006              | 40.91           | 0.9880          | 0.005              |
|        | GaussHDR [5]           | 40.47             | 0.9810          | 0.017              | 43.17           | 0.9921          | 0.003              | 43.50           | 0.9911          | 0.003              | 41.73           | 0.9874          | 0.005              |
|        | GaussHDR $\dagger$ [5] | 45.21             | 0.9942          | 0.002              | 43.76           | 0.9941          | 0.002              | 43.52           | 0.9919          | 0.003              | 42.91           | 0.9911          | 0.004              |
|        | Ours                   | 44.02             | 0.9926          | 0.003              | 43.12           | 0.9929          | 0.003              | 43.56           | 0.9922          | 0.003              | 39.39           | 0.9649          | 0.016              |
|        | Ours $\dagger$         | 44.96             | 0.9941          | 0.002              | 43.25           | 0.9939          | 0.002              | 44.08           | 0.9932          | 0.002              | 42.48           | 0.9896          | 0.004              |
| LDR-NE | HDR-NeRF [2]           | 42.36             | 0.9892          | 0.008              | 38.46           | 0.9822          | 0.014              | 38.56           | 0.9802          | 0.013              | 36.04           | 0.9683          | 0.021              |
|        | HDR-GS [1]             | 25.62             | 0.8598          | 0.175              | 15.44           | 0.7160          | 0.305              | 18.00           | 0.7981          | 0.229              | 35.75           | 0.9810          | 0.013              |
|        | GaussHDR [5]           | 39.62             | 0.9798          | 0.020              | 42.40           | 0.9916          | 0.004              | 42.90           | 0.9913          | 0.003              | 41.56           | 0.9890          | 0.005              |
|        | GaussHDR $\dagger$ [5] | 43.33             | 0.9934          | 0.003              | 42.12           | 0.9933          | 0.003              | 42.04           | 0.9914          | 0.003              | 42.60           | 0.9916          | 0.004              |
|        | Ours                   | 43.36             | 0.9925          | 0.003              | 42.15           | 0.9925          | 0.003              | 42.96           | 0.9923          | 0.002              | 39.46           | 0.9707          | 0.016              |
|        | Ours $\dagger$         | 43.58             | 0.9938          | 0.002              | 42.40           | 0.9938          | 0.002              | 43.49           | 0.9935          | 0.002              | 41.83           | 0.9906          | 0.004              |
| HDR    | HDR-NeRF [2]           | 30.17             | 0.9873          | 0.017              | 22.84           | 0.9359          | 0.047              | 18.16           | 0.8749          | 0.063              | 21.68           | 0.9514          | 0.062              |
|        | HDR-GS [1]             | 20.88             | 0.8194          | 0.205              | 20.16           | 0.8476          | 0.185              | 9.85            | 0.6003          | 0.296              | 11.10           | 0.4262          | 0.234              |
|        | GaussHDR [5]           | 35.49             | 0.9666          | 0.029              | 36.30           | 0.9734          | 0.016              | 36.81           | 0.9666          | 0.016              | 34.36           | 0.9655          | 0.021              |
|        | GaussHDR $\dagger$ [5] | 38.61             | 0.9832          | 0.008              | 37.51           | 0.9780          | 0.012              | 37.13           | 0.9691          | 0.013              | 35.64           | 0.9720          | 0.014              |
|        | Ours                   | 38.57             | 0.9817          | 0.008              | 37.37           | 0.9774          | 0.011              | 37.22           | 0.9693          | 0.011              | 34.26           | 0.9418          | 0.030              |
|        | Ours $\dagger$         | 39.04             | 0.9837          | 0.006              | 37.68           | 0.9790          | 0.010              | 37.46           | 0.9710          | 0.011              | 35.60           | 0.9718          | 0.014              |
